# Supplementary material for: Optimisation of the HS-SPME/GC-MS Approach by Design of Experiments Combined with Chemometrics for the Classification of Cretan Virgin Olive Oils
Source: MDPI journal article supplement (doi:10.3390/metabo12020114), 2022-01-25
Supplement: s1 [file s1]

## Supplemental Data

### **Optimisation of HS-SPME-GC-MS Approach by Design of Experiments Combined with Chemometrics for the Classification of Cretan Virgin Olive Oils**

Artemis Lioupi<sup>1,2,3</sup>, Ioannis Sampsonidis<sup>2,3,4</sup>, Christina Virgiliou<sup>1,2,3</sup>, Vasiliki Papoti<sup>5</sup>, Apostolos Spyros<sup>6</sup>, Kyriaki G. Zinoviadou<sup>5</sup>, Georgios Theodoridis<sup>1,2,3,\*</sup>

1 Laboratory of Analytical Chemistry, School of Chemistry, Aristotle University of Thessaloniki, 54124 Thessaloniki, Greece

2 Biomic AUTH, Center for Interdisciplinary Research and Innovation (CIRI-AUTH), Balkan Center B1.4, 10th km Thessaloniki-Thermi Rd, P.O. Box 8318, GR 57001, Thessaloniki, Greece

3 FoodOmicsGR Research Infrastructure, AUTH Node, Center for Interdisciplinary Research and Innovation (CIRI-AUTH), Balkan Center B1.4, 10th km Thessaloniki-Thermi Rd, P.O. Box 8318, GR 57001, Thessaloniki, Greece

4 Department of Nutritional Sciences and Dietetics, International Hellenic University, GR-574 00 Thessaloniki, Greece

5 Department of Food Science and Technology, Perrotis College, Thessaloniki, Greece

6 NMR Laboratory, Department of Chemistry, University of Crete, P.O. Box 2208, Voutes Campus, 710 03, Heraklion, Crete, Greece

\* Correspondence: gtheodor@chem.auth.gr (G. Theodoridis)

**Table S1:** Quadratic model parameters including term estimates, standard error (Std.Error), t values and *p*-values. Term significance is provided in the column Signif, in a scale given at the footnote of the table. Extraction temperature (x1), conditioning time (x2), extraction time (x3), desorption time (x4) and desorption temperature (x5). Example: x1 is a first order term, x1:x2 is a two-way interaction term and x1^2 is a quadratic term.

|                                                            | Estimate   | Std. Error | t value  | Pr(> t )  | Signif. |
|------------------------------------------------------------|------------|------------|----------|-----------|---------|
| (Intercept)                                                | 4848543089 | 48399344   | 100.1779 | <2.2e-16  | ***     |
| x1                                                         | 177609148  | 24769154   | 7.1706   | 1.82E-05  | ***     |
| x2                                                         | -13202358  | 24769154   | -0.5330  | 0.6046238 |         |
| x3                                                         | 127294342  | 24769154   | 5.1392   | 0.0003236 | ***     |
| x4                                                         | 40332181   | 24769154   | 1.6283   | 0.1317333 |         |
| x5                                                         | 26088628   | 24769154   | 1.0533   | 0.3148037 |         |
| x1:x2                                                      | -40729724  | 30335894   | -1.3426  | 0.2064436 |         |
| x1:x3                                                      | -3857485   | 30335894   | -0.1272  | 0.9011092 |         |
| x1:x4                                                      | 28416376   | 30335894   | 0.9367   | 0.3690108 |         |
| x1:x5                                                      | 26551327   | 30335894   | 0.8752   | 0.4001486 |         |
| x2:x3                                                      | -20189553  | 30335894   | -0.6655  | 0.5194209 |         |
| x2:x4                                                      | 30561022   | 30335894   | 1.0074   | 0.3353792 |         |
| x2:x5                                                      | 24270080   | 30335894   | 0.8000   | 0.4406207 |         |
| x3:x4                                                      | 33310092   | 30335894   | 1.0980   | 0.2956397 |         |
| x3:x5                                                      | 50072008   | 30335894   | 1.6506   | 0.1270555 |         |
| x4:x5                                                      | -58140167  | 30335894   | -1.9165  | 0.0816296 | .       |
| x1^2                                                       | 18949684   | 22404543   | 0.8458   | 0.4156859 |         |
| x2^2                                                       | -20693141  | 22404543   | -0.9236  | 0.3755034 |         |
| x3^2                                                       | -39874246  | 22404543   | -1.7797  | 0.1027255 |         |
| x4^2                                                       | -35067089  | 22404543   | -1.5652  | 0.1458367 |         |
| x5^2                                                       | -15047133  | 22404543   | -0.6716  | 0.5156883 |         |
| -----                                                      |            |            |          |           |         |
| Signif. codes: '***' -0.001 '**' - 0.01 '*' -0.05 '.' -0.1 |            |            |          |           |         |

**Table S2:** Quality characteristics of EVOO samples.

| No | Sample code | Variety   | Type         | Origin        | Region    |
|----|-------------|-----------|--------------|---------------|-----------|
| 1  | TN8         | Koroneiki | Organic      | Mesara        | Heraklion |
| 2  | KX8         | Koroneiki | Conventional | Rethymnon     | Rethymnon |
| 3  | PK6         | Koroneiki | Organic      | Panormo       | Rethymnon |
| 4  | ZA2         | Tsounati  | Conventional | Episkopi      | Heraklion |
| 5  | ZK4         | Koroneiki | Conventional | Kissamos      | Chania    |
| 6  | KP1         | Koroneiki | Organic      | Chania        | Chania    |
| 7  | AM9         | Koroneiki | Organic      | Manoliopoulo  | Chania    |
| 8  | XT2         | Koroneiki | Conventional | Mesara        | Heraklion |
| 9  | XA9         | Koroneiki | Conventional | Kolimpari     | Chania    |
| 10 | XP5         | Koroneiki | Organic      | Peza          | Heraklion |
| 11 | AT9         | Koroneiki | Conventional | Maramvelos    | Lasithi   |
| 12 | ZB5         | Koroneiki | Conventional | Agia Varvara  | Heraklion |
| 13 | NT1         | Koroneiki | Conventional | Choustouliana | Heraklion |
| 14 | BK5         | Koroneiki | Conventional | Kolimpari     | Chania    |
| 15 | KN2         | Koroneiki | Organic      | Apokoronas    | Chania    |
| 16 | AN7         | Koroneiki | Conventional | Mesara        | Heraklion |
| 17 | XM4         | Koroneiki | Conventional | Akrotiri      | Chania    |
| 18 | XB1         | Koroneiki | Organic      | Mesara        | Heraklion |
| 19 | NX3         | Koroneiki | Conventional | Mylopotamos   | Rethymnon |
| 20 | AE5         | Koroneiki | Conventional | Apokoronas    | Chania    |
| 21 | TM5         | Koroneiki | Conventional | Kalesa        | Heraklion |
| 22 | KM9         | Koroneiki | Conventional | Kolimpari     | Chania    |

|    |     |                    |              |                     |                  |
|----|-----|--------------------|--------------|---------------------|------------------|
| 23 | NM6 | Koroneiki          | Organic      | Mesara              | Heraklion        |
| 24 | NT9 | Koroneiki          | Organic      | Chania              | Chania           |
| 25 | EO5 | Koroneiki          | Organic      | Rethymnon           | Rethymnon        |
| 26 | AK5 | Koroneiki          | Conventional | Sitia               | Lasithi          |
| 27 | BN3 | Koroneiki          | Conventional | Arkalochori         | Heraklion        |
| 28 | AK1 | Tsounati           | Organic      | Selino              | Chania           |
| 29 | PM2 | Koroneiki          | Conventional | Sitia               | Lasithi          |
| 30 | ZH3 | Koroneiki          | Organic      | Apesokari<br>Mesara | Heraklion        |
| 31 | MN4 | Koroneiki          | Organic      | Sitia               | Lasithi          |
| 32 | HN6 | Koroneiki          | Conventional | Ageliana            | Rethymnon        |
| 33 | MK2 | Koroneiki/Tsounati | Conventional | Chania              | Chania           |
| 34 | NK8 | Koroneiki          | Conventional | Xerokampi           | Heraklion        |
| 35 | TA1 | Koroneiki          | Organic      | Mesara              | Heraklion        |
| 36 | BO3 | Koroneiki          | Conventional | Mesara              | Heraklion        |
| 37 | OE3 | Koroneiki          | Conventional | Emparos             | Heraklion        |
| 38 | ΠΧ2 | Koroneiki          | Conventional | Heraklion/Chania    | Heraklion/Chania |
| 39 | ZT6 | Koroneiki          | Conventional | Kolimpari           | Chania           |
| 40 | AT8 | Koroneiki          | Conventional | Mesara              | Heraklion        |
| 41 | HE2 | Koroneiki          | Organic      | Laithi              | Lasithi          |
| 42 | TA5 | Koroneiki          | Conventional | Sitia               | Lasithi          |
| 43 | PB9 | Koroneiki          | Conventional | Zakros              | Lasithi          |
| 44 | TM8 | Tsounati           | Organic      | Mariou              | Rethymnon        |
| 45 | HK3 | Koroneiki          | Conventional | Mesara              | Heraklion        |
| 46 | OZ7 | Koroneiki          | Organic      | Kolimpari           | Chania           |
| 47 | KM4 | Koroneiki          | Conventional | Thrapsano           | Heraklion        |
| 48 | TY1 | Koroneiki          | Conventional | Rethymnon           | Rethymnon        |
| 49 | ZK1 | Koroneiki          | Conventional | Kritsa              | Lasithi          |

|    |     |                    |              |                      |                  |
|----|-----|--------------------|--------------|----------------------|------------------|
| 50 | NE1 | Koroneiki          | Conventional | Lyttos               | Heraklion        |
| 51 | TZ2 | Koroneiki          | Conventional | Sivas                | Heraklion        |
| 52 | NT5 | Koroneiki          | Conventional | Peza                 | Heraklion        |
| 53 | HP2 | Koroneiki          | Conventional | Mylopotamos          | Rethymnon        |
| 54 | HT5 | Koroneiki          | Conventional | Kritsa               | Lasithi          |
| 55 | KT5 | Koroneiki          | Conventional | Kalesa<br>malevisiou | Heraklion        |
| 56 | MP1 | Koroneiki          | Organic      | Anoskeli             | Chania           |
| 57 | ZE2 | Koroneiki          | Conventional | Mariou               | Rethymnon        |
| 58 | PT5 | Koroneiki/Tsounati | Conventional | Heraklion/Chania     | Heraklion/Chania |
| 59 | XM1 | Koroneiki          | Conventional | Emparos              | Heraklion        |
| 60 | TM4 | Koroneiki          | Conventional | Kritsa               | Lasithi          |
| 61 | MN8 | Koroneiki          | Organic      | Ageliana             | Rethymnon        |
| 62 | AB3 | Koroneiki          | Conventional | Heraklion            | Heraklion        |
| 63 | EK2 | Koroneiki          | Conventional | Choumeri             | Heraklion        |

**Table S3:** Complete Circumscribed Central Composite design indicating the run order along with the levels of each factor. Units for extraction temperature (Ex.temp) are °C, conditioning time (Co.time) mins, extraction time (Ex.time) mins, desorption temperature (Des.temp) °C and desorption time (Des.time) mins.

| Run order | Ex.temp | Co.time | Ex.time | Des.temp | Des.time |
|-----------|---------|---------|---------|----------|----------|
| 1         | 55      | 15      | 35      | 260      | 7.5      |
| 2         | 55      | 15      | 35      | 260      | 7.5      |
| 3         | 40      | 20      | 20      | 250      | 5        |
| 4         | 70      | 20      | 50      | 250      | 5        |
| 5         | 40      | 10      | 20      | 270      | 5        |
| 6         | 70      | 20      | 50      | 270      | 10       |
| 7         | 40      | 20      | 50      | 250      | 10       |
| 8         | 40      | 20      | 50      | 270      | 5        |
| 9         | 40      | 10      | 20      | 250      | 10       |
| 10        | 70      | 10      | 20      | 270      | 10       |
| 11        | 55      | 15      | 35      | 260      | 7.5      |
| 12        | 55      | 15      | 35      | 260      | 7.5      |
| 13        | 70      | 20      | 20      | 270      | 5        |
| 14        | 70      | 10      | 50      | 250      | 10       |
| 15        | 40      | 10      | 50      | 270      | 10       |
| 16        | 70      | 10      | 20      | 250      | 5        |
| 17        | 70      | 10      | 50      | 270      | 5        |
| 18        | 40      | 20      | 20      | 270      | 10       |
| 19        | 70      | 20      | 20      | 250      | 10       |
| 20        | 40      | 10      | 50      | 250      | 5        |
| 21        | 55      | 15      | 35      | 260      | 7.5      |
| 22        | 55      | 15      | 35      | 260      | 7.5      |
| 23        | 55      | 15      | 35      | 260      | 12.5     |
| 24        | 25      | 15      | 35      | 260      | 7.5      |
| 25        | 55      | 25      | 35      | 260      | 7.5      |
| 26        | 55      | 15      | 35      | 240      | 7.5      |
| 27        | 55      | 15      | 35      | 260      | 2.5      |
| 28        | 55      | 15      | 35      | 280      | 7.5      |
| 29        | 85      | 15      | 35      | 260      | 7.5      |
| 30        | 55      | 15      | 5       | 260      | 7.5      |
| 31        | 55      | 5       | 35      | 260      | 7.5      |
| 32        | 55      | 15      | 65      | 260      | 7.5      |

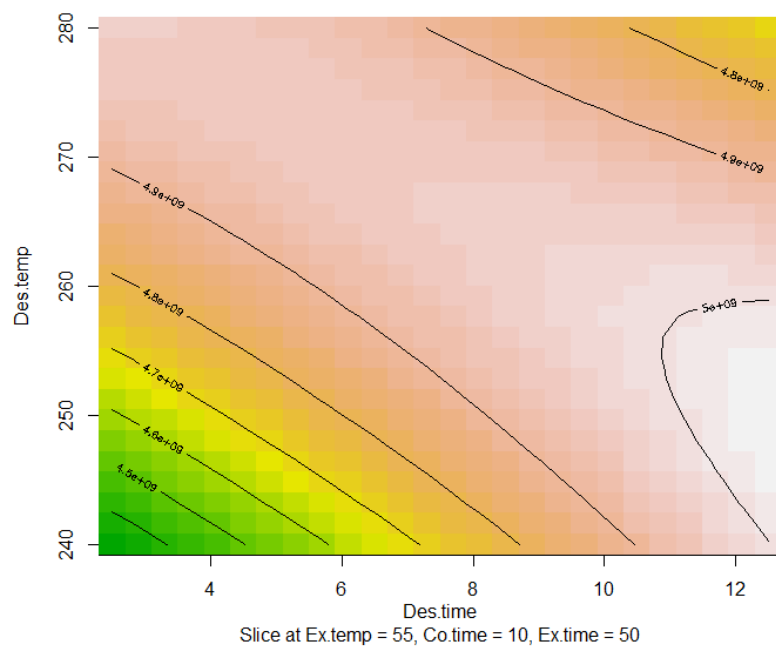

**Figure S1:** Contour plot for factors desorption temperature (Des.temp) and desorption time (Des.time). Green colour indicates lower response values and pink colour higher response values. Contours include corresponding response levels. The contour plot is a slice at the selected points for extraction temperature (Ex.temp) and extraction time (Ex.time), and the centre point for conditioning time (Co.time).

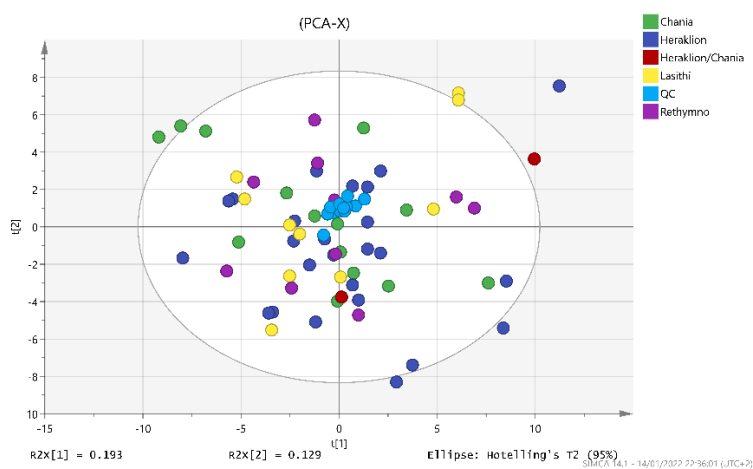

**Figure S2:** PCA score plot showing the examined groups together with QC samples. QC samples are clustering together, showing system's stability.

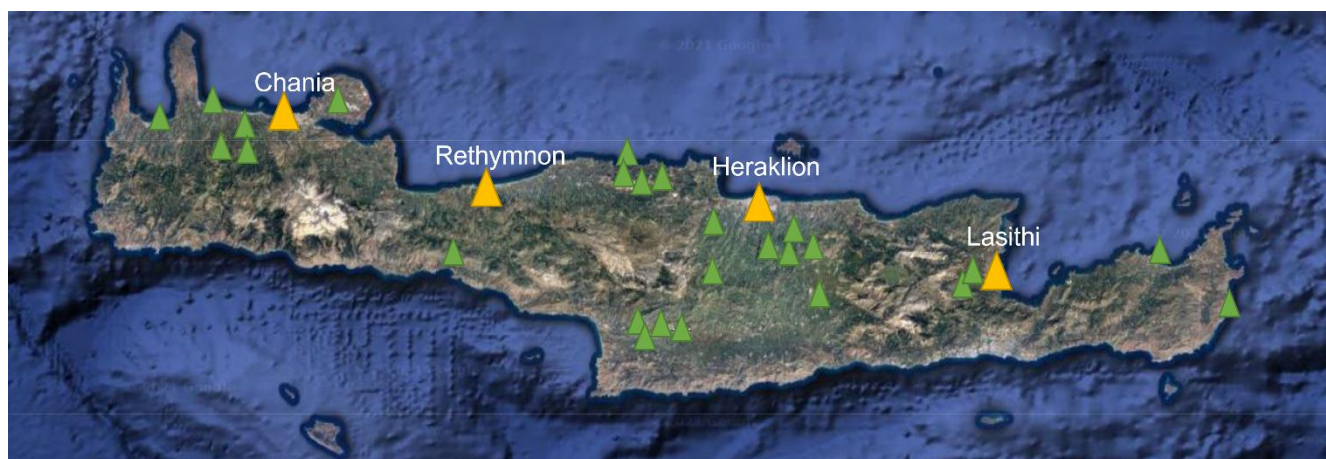

**Figure S3:** Geographical origin of Cretan EVOOs analysed in our study.
